# Supplementary material
Source: PubMed Central journal article supplement (PMC6138509)

## SUPPLEMENTAL FIGURE

**Supplemental Figure.** Subject flow chart. <sup>a</sup>Subject was discontinued by sponsor from bioanalytical analysis because subject did not receive the correct amount of dose in infusion because of a dose preparation error.

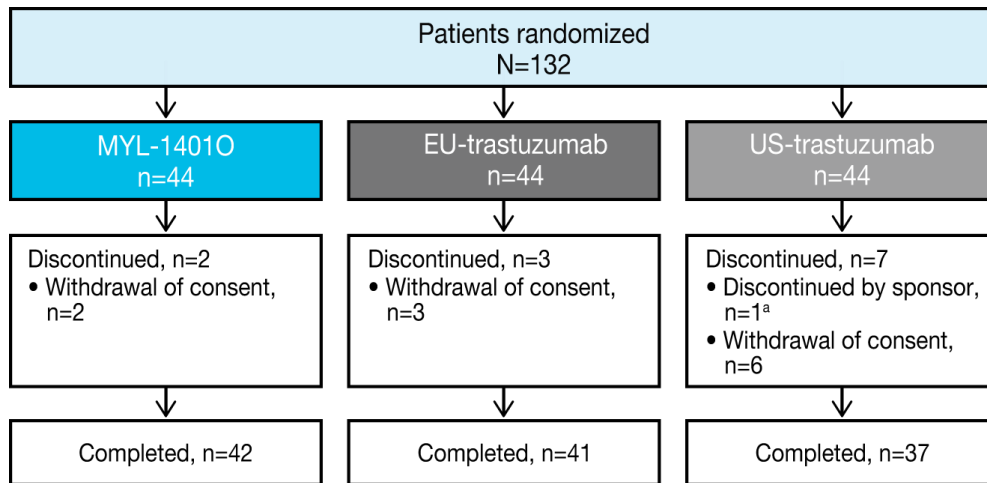

Supplement: BCP-84-2336-s001.pdf [file BCP-84-2336-s001.pdf]
